# Supplementary material for: Recurrence of Idiopathic Membranous Nephropathy in the Kidney Allograft: A Systematic Review
Source: MDPI journal article supplement (doi:10.3390/biomedicines12040739), 2024-03-26
Supplement: s1 [file s1]

## Supplementary Material 2

**Table S1.** Search strategy in PubMed database.

| PUBMED (n=274) |                                                                                                                                                                             |         |
|----------------|-----------------------------------------------------------------------------------------------------------------------------------------------------------------------------|---------|
| Search         | Query                                                                                                                                                                       | Results |
| #7             | Search: (((kidney) AND (membranous AND nephropathy)) AND (posttransplantation)) AND (recurrence) Sort by: Most Recent                                                       | 41      |
| #6             | Search: (#5) AND (rituximab) Sort by: Most Recent                                                                                                                           | 133     |
| #5             | Search: (((kidney OR renal) AND (transplantation OR transplant OR allograft)) AND (recurrence OR recurrent)) AND (membranous nephropathy OR nephritis) Sort by: Most Recent | 1532    |
| #4             | Search: ((allograft) AND (membranous nephritis)) AND (recurrence) Sort by: Most Recent                                                                                      | 173     |
| #3             | Search: (((kidney transplantation) AND (membranous nephropathy)) AND (recurrence)) AND (rituximab) Sort by: Most Recent                                                     | 29      |
| #2             | Search: ((kidney transplantation) AND (membranous nephropathy)) AND (post transplantation) Sort by: Most Recent                                                             | 83      |
| #1             | Search: ((kidney transplantation) AND (membranous nephropathy)) AND (recurrence) Sort by: Most Recent                                                                       | 209     |

**Table S2.** Search strategy in SCOPUS database.

| SCOPUS (n=272) |                                                                                                                                                                                                                                                                                                                |           |
|----------------|----------------------------------------------------------------------------------------------------------------------------------------------------------------------------------------------------------------------------------------------------------------------------------------------------------------|-----------|
| ID             | Query                                                                                                                                                                                                                                                                                                          | Documents |
| #7             | ( ALL ( kidney ) AND ALL ( membranous AND nephropathy ) AND ALL ( posttransplantation ) AND ALL ( recurrence ) )                                                                                                                                                                                               | 180       |
| #6             | (( ALL ( kidney AND transplantation ) AND ALL ( membranous AND nephropathy ) AND ALL ( recurrence ) AND ALL ( rituximab ) ) AND ( ( ALL ( kidney OR renal ) AND ALL ( transplantation OR transplant OR allograft ) AND ALL ( recurrence OR recurrent ) AND ALL ( membranous AND nephropathy OR nephritis ) ) ) | 406       |
| #5             | ( ALL ( kidney AND transplantation ) AND ALL ( membranous AND nephropathy ) AND ALL ( recurrence ) AND ALL ( rituximab ) )                                                                                                                                                                                     | 507       |
| #4             | ( ALL ( kidney OR renal ) AND ALL ( transplantation OR transplant OR allograft ) AND ALL ( recurrence OR recurrent ) AND ALL ( membranous AND nephropathy OR nephritis ) )                                                                                                                                     | 1852      |
| #3             | ( ALL ( allograft ) AND ALL ( membranous AND nephritis ) AND ALL ( recurrence ) )                                                                                                                                                                                                                              | 439       |
| #2             | ( ALL ( kidney AND transplantation ) AND ALL ( membranous AND nephropathy ) AND ALL ( posttransplantation ) )                                                                                                                                                                                                  | 301       |
| #1             | ALL ( "kidney AND transplantation" AND "membranous AND nephropathy" AND "recurrence" )                                                                                                                                                                                                                         | 1400      |

**Table S3.** Search strategy in Web of Science database.

| WEB OF SCIENCE (n=149) |         |                                                                                                                                                                    |
|------------------------|---------|--------------------------------------------------------------------------------------------------------------------------------------------------------------------|
| Set                    | Results | Saved History                                                                                                                                                      |
| #6                     | 60      | (#5) AND ALL=(rituximab)                                                                                                                                           |
| #5                     | 494     | ((((ALL=(kidney OR renal)) AND ALL=(transplantation OR transplant OR allograft)) AND ALL=(recurrence OR recurrent)) AND ALL=(membranous nephropathy OR nephritis)) |
| #4                     | 23      | ((ALL=(allograft)) AND ALL=(membranous nephritis)) AND ALL=(recurrence)                                                                                            |
| #3                     | 26      | ((((ALL=(kidney transplantation)) AND ALL=(membranous nephropathy)) AND ALL=(recurrence)) AND ALL=(rituximab))                                                     |
| #2                     | 11      | ((((ALL=(kidney)) AND ALL=(membranous AND nephropathy)) AND ALL=(posttransplantation)) AND ALL=(recurrence))                                                       |
| #1                     | 103     | ((ALL=(kidney transplantation)) AND ALL=(membranous nephropathy)) AND ALL=(recurrence)                                                                             |

**Table S4.** Demographic characteristics of transplanted patients with iMN recurrence.

|                                                                      |                  |
|----------------------------------------------------------------------|------------------|
| Age (mean, years) n=139                                              | 47.82            |
| Men (n)                                                              | 93/130 (71.54%)  |
| Women (n)                                                            | 37/130 (28.46%)  |
| Living donors (n)                                                    | 89/123 (72.36%)  |
| Deceased donors (n)                                                  | 34/123 (27.64%)  |
| ABO Incompatibility (n)                                              | 2/33 (6.07%)     |
| Biopsy with iMN in native kidney (n)                                 | 128/130 (98.46%) |
| Induction therapy:                                                   |                  |
| • ATG (n)                                                            | 41/58 (70.68%)   |
| • Basiliximab (n)                                                    | 13/34 (38.23%)   |
| • Alemtuzumab (n)                                                    | 4/18 (22.22%)    |
| • OKT3 (n)                                                           | 0/5 (0%)         |
| • Plasmapheresis* (n)                                                | 1/15 (6.67%)     |
| • Rituximab* (n)                                                     | 2/33 (6.07%)     |
| Maintenance therapy:                                                 |                  |
| • Steroids (n)                                                       | 61/71 (85.92%)   |
| • MPA (n)                                                            | 50/62 (80.64%)   |
| • Tacrolimus (n)                                                     | 83/113 (73.45%)  |
| • Cyclosporin (n)                                                    | 30/113 (26.55%)  |
| • Azathioprine (n)                                                   | 7/20 (35%)       |
| Diagnostic biopsy for recurrent iMN:                                 |                  |
| • Per- protocol (n)                                                  | 45/134 (33.59%)  |
| • Clinical indications (n)                                           | 89/134 (66.41%)  |
| Serum creatinine at recurrence (mean, mg/dl) n=97                    | 2.00             |
| Proteinuria at recurrence (mean, g/24h) n=117                        | 3.97             |
| Treatment of recurrent iMN with Rituximab:‡ (n)                      | 55/115 (47.82%)  |
| • 4 doses of 375 mg/m <sup>2</sup> per week (n)                      | 8                |
| • Single dose of 1gr (n)                                             | 2                |
| • 2 doses of 1 gr with an interval of 2 weeks (n)                    | 19               |
| • 1-2 doses of 375 mg/m <sup>2</sup> with an interval of 2 weeks (n) | 6                |

\*: ABO Incompatibility

‡: not mentioned in 20 patients

**Table S5.** Quality assessment using the ROBINS-E tool.

| Study                 | Confounding   | Classification of exposures | Selection of participants | Deviations from intended exposures | Missing Data  | Measurement of outcomes | Selection of the reported result | Overall bias |
|-----------------------|---------------|-----------------------------|---------------------------|------------------------------------|---------------|-------------------------|----------------------------------|--------------|
| Couchoud et al. 1995  | Some Concerns | Low                         | Low                       | Low                                | Low           | Low                     | Low                              | Moderate     |
| Briganti et al. 2002  | Low           | Low                         | Low                       | Low                                | Low           | Low                     | Low                              | Moderate     |
| Ibrahim et al. 2006   | Low           | Low                         | Low                       | Low                                | Low           | Low                     | Low                              | Low          |
| Moroni et al. 2010    | Low           | Low                         | Low                       | Some Concerns                      | Low           | Low                     | Low                              | Moderate     |
| Sprangers et al. 2010 | Low           | Low                         | Low                       | Some Concerns                      | Low           | Low                     | Low                              | Moderate     |
| Debiec et al. 2011    | Some Concerns | Low                         | Low                       | Low                                | Low           | Low                     | Low                              | Moderate     |
| Rodriguez et al. 2012 | Some Concerns | Some Concerns               | Low                       | Some Concerns                      | Low           | Low                     | Low                              | Moderate     |
| Kennedy et al. 2013   | Some Concerns | Low                         | Low                       | Some Concerns                      | Low           | Low                     | Low                              | Moderate     |
| Kattah et al. 2015    | Low           | Low                         | Low                       | Some Concerns                      | Low           | Low                     | Low                              | Moderate     |
| Quintana et al. 2015  | Some Concerns | Low                         | Low                       | Some Concerns                      | Some Concerns | Low                     | Low                              | Moderate     |
| Grupper et al. 2016   | Some Concerns | Low                         | Low                       | Some Concerns                      | Low           | Low                     | Low                              | Moderate     |
| Gupta et al. 2016     | Low           | Low                         | Low                       | Some Concerns                      | Low           | Low                     | Low                              | Moderate     |

**Table S6.** Graft survival in transplanted patients with recurrent iMN.

| Study                 | Transplanted patients due to iMN (n) | Recurrent iMN in renal allograft (n) <sup>+</sup> | Graft loss due to recurrent iMN (n) | Control transplanted patients with no iMN recurrence (n)                                                                                                                                                                                                                                                                                                                          | Graft loss due to any other cause (n) |
|-----------------------|--------------------------------------|---------------------------------------------------|-------------------------------------|-----------------------------------------------------------------------------------------------------------------------------------------------------------------------------------------------------------------------------------------------------------------------------------------------------------------------------------------------------------------------------------|---------------------------------------|
| Couchoud et al. 1995  | 18                                   | 5                                                 | 1 (20%)                             | 14                                                                                                                                                                                                                                                                                                                                                                                | 5 (35.71%)                            |
| Briganti et al. 2002  | 81                                   | 5                                                 | – <sup>*</sup>                      | 76                                                                                                                                                                                                                                                                                                                                                                                | – <sup>¥</sup>                        |
| Ibrahim et al. 2006   | 19                                   | 4                                                 | 0 (0%)                              | Group 1: transplant patients due to various types of GN with rapid discontinuation of corticosteroids (n=105)<br>Group 2: transplanted patients for non-GN diseases with rapid discontinuation of corticosteroids (n=439)<br>Group 3: historical control group of transplanted patients due to various types of GN with long-term steroid-based immunosuppressive therapy (n=260) | – <sup>¥</sup>                        |
| Moroni et al. 2010    | 35                                   | 12                                                | 6 (50%)                             | 23                                                                                                                                                                                                                                                                                                                                                                                | 11 (47.82%)                           |
| Sprangers et al. 2010 | 34                                   | 15                                                | 2 (13.33%)                          | 19                                                                                                                                                                                                                                                                                                                                                                                | 4 (21.05%)                            |
| Debiec et al. 2011    | 10                                   | 11 <sup>+</sup>                                   | 6 (54.54%)                          | 6                                                                                                                                                                                                                                                                                                                                                                                 | – <sup>¥</sup>                        |
| Rodriguez et al. 2012 | 18                                   | 18                                                | 0 (0%)                              | 8                                                                                                                                                                                                                                                                                                                                                                                 | 0 (0%)                                |
| Kennedy et al. 2013   | 32                                   | 13 <sup>+</sup>                                   | 7 (53.84%)                          | 23                                                                                                                                                                                                                                                                                                                                                                                | 6 (26.08%)                            |
| Kattah et al. 2015    | 26                                   | 18                                                | 2 (11.11%)                          | 8                                                                                                                                                                                                                                                                                                                                                                                 | 2 (25%)                               |
| Quintana et al. 2015  | 21                                   | 7                                                 | 1 (14.28%)                          | 14                                                                                                                                                                                                                                                                                                                                                                                | – <sup>¥</sup>                        |
| Grupper et al. 2016   | 63                                   | 30                                                | 5 (16.66%)                          | 33                                                                                                                                                                                                                                                                                                                                                                                | 6 (18.18%)                            |
| Gupta et al. 2016     | 16                                   | 6                                                 | 0 (0%)                              | 10                                                                                                                                                                                                                                                                                                                                                                                | 1 (10%)                               |
| <b>Total</b>          | <b>373</b>                           | <b>144</b>                                        | <b>30 (21.59%)<sup>**</sup></b>     | <b>234</b>                                                                                                                                                                                                                                                                                                                                                                        | <b>35 (25.36%)<sup>***</sup></b>      |

<sup>+</sup>: refers to number of grafts as some patients received >1 kidney transplants.

<sup>\*</sup>: only the hazard ratio is presented in this study

<sup>¥</sup>: number of grafts lost in control patients not reported.

<sup>\*\*</sup>: for n=139 grafts

<sup>\*\*\*</sup>: for n=138 control patients

GN: glomerulonephritis

**Table S7.** Graft survival between patients with iMN recurrence that were treated with rituximab and those that received no specific treatment.

| Study                 | Number of patients   |          |                         |          |               |          |
|-----------------------|----------------------|----------|-------------------------|----------|---------------|----------|
|                       | Recurrence iMN + RTX |          | Recurrence iMN + no RTX |          | No Recurrence |          |
|                       | Graft loss           | Survival | Graft loss              | Survival | Graft loss    | Survival |
| Couchoud et al. 1995* | -*                   | -*       | 1 (25%)                 | 4        | 5             | 9        |
| Moroni et al. 2010    | 1 (50%)              | 1        | 5 (50%)                 | 5        | 11            | 12       |
| Sprangers et al. 2010 | 0 (0%)               | 4        | 2 (18.19%)              | 9        | 4             | 15       |
| Rodriguez et al. 2012 | 0 (0%)               | 8        | 0 (0%)                  | 10       | 0             | 8        |
| Kennedy et al. 2013   | 0 (0%)               | 1        | 7 (58.34%)              | 5        | 6             | 17       |
| Kattah et al. 2015    | 3 (27.28%)           | 8        | 0 (0%)                  | 5        | 2             | 6        |
| Quintana et al. 2015  | 1 (25%)              | 4        | 0 (0%)                  | 3        | -¥            | -¥       |
| Grupper et al. 2016   | 3 (17.64%)           | 14       | 2 (15.39%)              | 11       | 6             | 27       |
| Gupta et al. 2016     | 1 (16.67%)           | 5        | 0 (0%)                  | 0        | 1             | 9        |

RTX: Rituximab, iMN: idiopathic membranous nephropathy

\* No rituximab was given

¥ number of grafts lost in control patients not reported
